# Supplementary material for: Toll-like receptor 9–induced type I IFN protects mice from experimental colitis
Source: JCI journal article supplement (doi:10.1172/jci22996), 2005-03-01
Supplement: sd1 [file 1]

## Supplemental Material

We evaluated the production of type 1 IFN by BM-PDC derived from *RAG1*<sup>-/-</sup> and SCID mice. BM-PDC were generated from bone marrow cells cultured with 100 ng/ml of hFlt3 ligand (PeproTech Inc. #300-19), and the levels of type 1 IFN generated upon stimulation with ISS-1 were determined by a bioassay and by an IFN- $\alpha$  ELISA kit (PBL Biomedical Laboratories). As shown in Supplemental Figure 1 below, we did not detect any IFN- $\alpha$  in the RAG- or SCID-derived BM-PDC supernatants after stimulation with ISS-1 and LPS (Supplemental Figure 2B) when tested by ELISA. In contrast, different levels of type 1 IFN in these supernatants were detected when tested by the bioassay. IFN- $\alpha$  levels were detectable by ELISA in the supernatants of BM-PDC upon stimulation with ISS-2, a class A CpG ODN that is known to elicit very high levels of this cytokine. As expected, the levels of IFN- $\alpha$  were by far higher in the supernatants of RAG-derived BM-PDC than in the supernatants of SCID-derived BM-PDC.

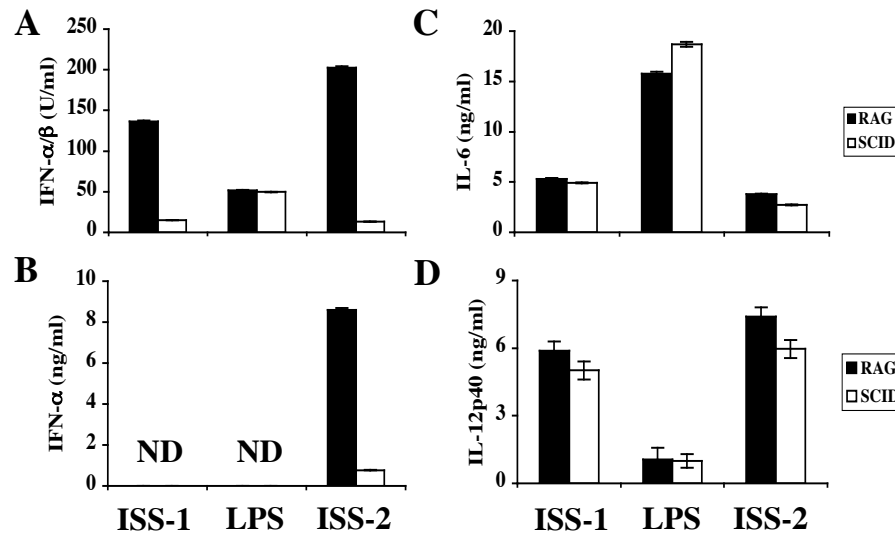

### Supplemental Figure 1: Comparison of assays for the measurement of type-1 IFN: Bioassay vs. ELISA.

BM-PDC ( $10^6$ /ml) from 3 *RAG1*<sup>-/-</sup> and 3 SCID mice were pooled and stimulated with ISS-1 (10  $\mu$ g/ml), LPS (50 ng/ml), and ISS-2 (10  $\mu$ g/ml). Cytokine levels in the supernatants were measured 24 hrs later (triplicates). (A) Type 1 IFN (IFN $\alpha/\beta$ ) levels (U/ml) by bioassay. (B) IFN- $\alpha$  levels (pg/ml) by ELISA (PBL). (C) IL-6 and (D) IL-12p40 levels (ELISA). ND - not detected.

The bioassay detects type 1 IFN activity, which consists of multiple IFN- $\alpha$  gene products and a single IFN- $\beta$  gene product. In contrast, the ELISA kit (PBL) detects only a few species of IFN- $\alpha$ . To verify and to measure the relative IFN- $\alpha$  and IFN- $\beta$  activities in the PDC supernatants, we neutralized IFN- $\alpha$  from the supernatants of ISS-stimulated BM-MDC. Thus, increasing concentrations of rabbit anti-mouse IFN- $\alpha$  antibody (PBL) and rabbit IgG (Jackson Immuno-Research Laboratories) were added to the supernatants and the resulting type 1 IFN was

analyzed by bioassay. As shown below, IFN- $\alpha$  neutralization inhibited up to 50% of the total type-1 IFN activity in the supernatants.

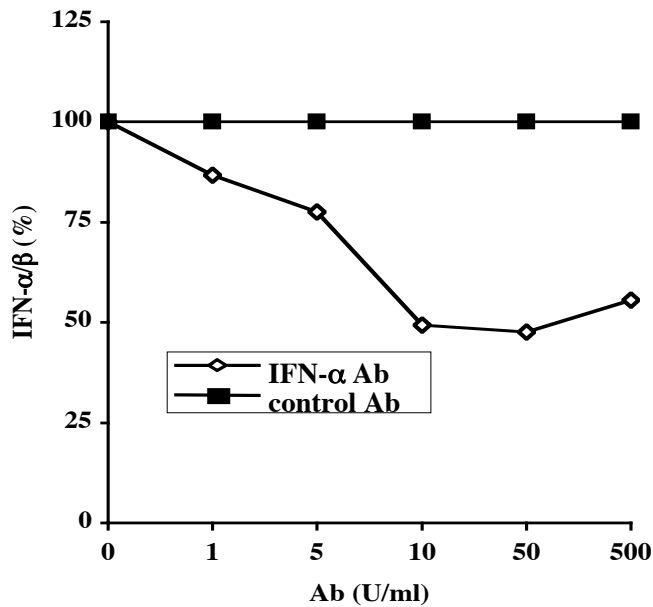

**Supplemental Figure 2: IFN- $\alpha$  neutralization does not abolish type-1 IFN activity when tested by bioassay**

BM-MDC ( $10^6$ /ml) generated from 3 RAG1<sup>-/-</sup> mice were pooled and stimulated with ISS-1 (10  $\mu$ g/ml). After 24 hrs the supernatants were collected and co-incubated with various concentrations of rabbit anti-mIFN- $\alpha$  IgG or control rabbit IgG overnight at 37°C. Type 1 IFN levels were measured in the supernatants by bioassay. The level obtained for each control IgG concentration was considered as 100% of type 1 IFN (IFN- $\alpha/\beta$ ) activity.

We performed a type 1 IFN bioassay using BM-MDC made from RAG deficient mice. These cells were stimulated with ISS-1 in the presence or absence of a novel DNA-PK inhibitor NU7026 (Calbiochem). As presented in the Figure below type 1 IFN production was inhibited by the DNA-PK inhibitor, while the IL-12 (p40) production was intact.

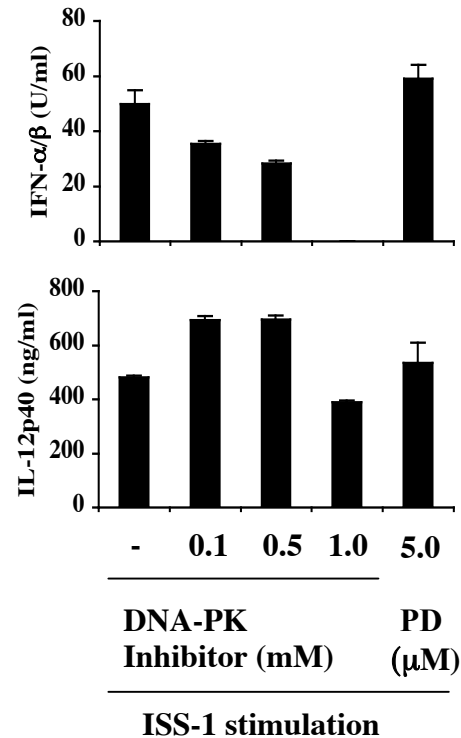

**Supplemental Figure 3: DNA-PK inhibitor suppresses type-1 IFN production from BMDC (MDC).**

BM-MDC ( $10^6$ /ml) from 2 *RAG1*<sup>-/-</sup> mice were pooled and co-incubated with or without various concentrations of DNA-PK or MEK inhibitor (control). Cells were stimulated with ISS-1 (10  $\mu$ g/ml). Cytokine levels in the supernatants were measured 24 hrs later in triplicate. IL-12 (p40) levels were measured by ELISA (BD-Pharmingen) and type 1 IFN (IFN- $\alpha/\beta$ ) levels (U/ml) were measured by bioassay.

We analyzed the response of BM-MDC and BM-PDC from RAG1 deficient and DNA-PK deficient mice (provided by Dr. Gloria Li, Memorial Sloan Kettering, NY). As shown in Supplemental Tables 1 and 2, after ISS or LPS stimulation the levels of IFN- $\alpha$  in the supernatants of these cells were below detection when measured by ELISA (PBL). In contrast, we detected type 1 IFN activity in these supernatants when tested by bioassay (Tables 1 and 2). The levels of type 1 IFN in the supernatants of BM-MDC and BM-PDC derived from RAG1 deficient animals were higher than those detected in BM-MDC and BM-PDC supernatants derived from DNA-PK deficient mice when tested by bioassay (Tables 1 and 2 below). These data combined with the SCID BM-MDC data presented in the main text indicate that DNA-PK is involved in type 1 IFN production by these two DC subsets upon TLR9 stimulation.

|                                    | IFN- $\alpha/\beta$ (U/ml) |            | IFN- $\alpha$ (pg/ml) |     | IL-6 (ng/ml) |            | IL-12p40 (ng/ml) |             |
|------------------------------------|----------------------------|------------|-----------------------|-----|--------------|------------|------------------|-------------|
|                                    | ISS-1                      | LPS        | ISS-1                 | LPS | ISS-1        | LPS        | ISS-1            | LPS         |
| <b><i>RAG</i><sup>-/-</sup></b>    | 190 $\pm$ 10               | 40 $\pm$ 5 | ND                    | ND  | 13 $\pm$ 2   | 28 $\pm$ 2 | 284 $\pm$ 21     | 96 $\pm$ 8  |
| <b><i>DNA-PK</i><sup>-/-</sup></b> | 35 $\pm$ 5                 | 35 $\pm$ 5 | ND                    | ND  | 12 $\pm$ 1   | 26 $\pm$ 2 | 272 $\pm$ 17     | 98 $\pm$ 10 |

**Supplemental Table 1: Reduced type-1 IFN production in BM-MDC from DNA-PK KO mice.**

BM-MDC (10<sup>6</sup>/ml) from 3 RAG1 and 3 DNA-PK KO mice were pooled and stimulated with ISS-1 (10  $\mu$ g/ml) or LPS (50 ng/ml). Cytokine levels in the supernatants were measured 24 hrs later in triplicate. Type 1 IFN levels (IFN $\alpha/\beta$ ) were measured by bioassay (U/ml), IFN- $\alpha$  levels were measured by ELISA (pg/ml, PBL) and IL-6 and IL-12p40 levels were measured by ELISA (BD-Pharmingen). ND - not detected.

|                                    | IFN- $\alpha/\beta$ (U/ml) |              | IFN- $\alpha$ (pg/ml) |     | IL-6 (ng/ml) |            | IL-12p40 (ng/ml) |             |
|------------------------------------|----------------------------|--------------|-----------------------|-----|--------------|------------|------------------|-------------|
|                                    | ISS-1                      | LPS          | ISS-1                 | LPS | ISS-1        | LPS        | ISS-1            | LPS         |
| <b><i>RAG</i><sup>-/-</sup></b>    | 527 $\pm$ 10               | 15 $\pm$ 0.5 | ND                    | ND  | 25 $\pm$ 2   | 13 $\pm$ 2 | 227 $\pm$ 14     | 44 $\pm$ 15 |
| <b><i>DNA-PK</i><sup>-/-</sup></b> | 89 $\pm$ 5                 | 22 $\pm$ 2   | ND                    | ND  | 22 $\pm$ 1   | 10 $\pm$ 2 | 200 $\pm$ 20     | 29 $\pm$ 9  |

**Supplemental Table 2: Reduced type-1 IFN production in BM-PDC from DNA-PK KO mice.**

BM-PDC (10<sup>6</sup>/ml) from 3 RAG1 and 3 DNA-PK KO mice were pooled and stimulated with ISS-1 (10  $\mu$ g/ml) or LPS (50 ng/ml). Cytokine levels were detected as described above for Table 1. ND - not detected.
